# Supplementary material
Source: PubMed Central journal article supplement (PMC7788212)
Supplement: ejhpharm-2020-002388supp002.pdf [file ejhpharm-2020-002388supp002.pdf]

**Table S1:** Reference recommendation derived from the CPG of WHO [1]

| No. | Reference recommendation           | Population                                                                               | Intervention <sup>a</sup>                                                                                        | Comparator <sup>b</sup>                                                      |
|-----|------------------------------------|------------------------------------------------------------------------------------------|------------------------------------------------------------------------------------------------------------------|------------------------------------------------------------------------------|
| #1  | Initial oxygen therapy             | Patients with SARI and respiratory distress, hypoxaemia or shock                         | Target SpO <sub>2</sub> >94%                                                                                     | Another target SpO <sub>2</sub>                                              |
| #2  | Maintenance oxygen therapy         | Patients stabilized after initial oxygen therapy                                         | Target SpO <sub>2</sub> >90%                                                                                     | Another target SpO <sub>2</sub>                                              |
| #3  | Empiric antimicrobials             | Patients with SARI and sepsis                                                            | Empiric antimicrobials within 1 hour of the initial assessment                                                   | No empiric antimicrobials                                                    |
| #4  | Fluid management                   | Patients with SARI                                                                       | Conservative strategy                                                                                            | Liberal strategy                                                             |
| #5  | Neuromuscular blockade             | Patients with moderate-severe ARDS (PaO <sub>2</sub> /FiO <sub>2</sub> < 150)            | No routine neuromuscular blockade use by continuous infusion                                                     | Routine use of neuromuscular blockade by continuous infusion                 |
| #6  | Thromboprophylaxis                 | Patients with SARI                                                                       | Pharmacological prophylaxis if without contraindications                                                         | No pharmacological prophylaxis                                               |
| #7  | Stress ulcer prevention            | Patients with SARI                                                                       | Administer histamine-2 receptor blockers or proton-pump inhibitors in patients with risk factors for GI bleeding | No administration of histamine-2 receptor blockers or proton-pump inhibitors |
| #8  | Resuscitation for septic shock (1) | Patients with septic shock                                                               | Administration of crystalloid fluid                                                                              | Administration of other fluid                                                |
| #9  | Resuscitation for septic shock (2) | Patients with septic shock                                                               | Use of hypotonic crystalloids, starches, or gelatins is not allowed                                              | Use of hypotonic crystalloids, starches, or gelatins is allowed              |
| #10 | Vasopressor for septic shock (1)   | Patients who septic shock persist during or after fluid resuscitation                    | Norepinephrine is considered first-line treatment                                                                | Another vasopressor is considered first-line treatment                       |
| #11 | Vasopressor for septic shock (2)   | Patients who received vasopressor for septic shock                                       | Target MAP ≥65 mmHg                                                                                              | Another target MAP                                                           |
| #12 | Inotrope for septic shock          | Patients who poor perfusion and cardiac dysfunction persist despite achieving MAP target | An inotrope is considered                                                                                        | An inotrope is not considered                                                |
| #13 | Systemic corticosteroids           | Patients with SARI                                                                       | No routine systemic corticosteroids use outside clinical trials                                                  | Routine systemic corticosteroids use outside clinical trials                 |

Abbreviations: SARI=severe acute respiratory infection; SpO<sub>2</sub>=oxygen saturation; ARDS=acute respiratory distress syndrome; PaO<sub>2</sub>=partial pressure of arterial oxygen; FiO<sub>2</sub>=percentage of inspired oxygen; MAP=mean arterial pressure

<sup>a</sup>Intervention was the approach adopted in CPG of WHO.

<sup>b</sup>Comparator was the approach in contrast to the CPG of WHO.

**Table S2:** Direction codings by recommendation across comparator CPGs

|                                              | ANZ [7] | BEL [8] | CAN [9] | NHC [10] | NIH [11] | SSC [12] | ICM [13] | UTD [14]       |
|----------------------------------------------|---------|---------|---------|----------|----------|----------|----------|----------------|
| <b>#1</b> Initial O <sub>2</sub> Therapy     | ≈       | ≈       | V       | ≈        | ≈        | ≈        | ≈        | ≈              |
| <b>#2</b> Maintenance O <sub>2</sub> Therapy | ≈       | ≈       | X       | ≈        | X        | X        | X        | X              |
| <b>#3</b> Empiric antibiotics                | V       | ≈       | V       | X        | ≈        | ≠        | O        | O              |
| <b>#4</b> Fluid management                   | V       | O       | V       | ≈        | ≈        | V        | O        | V              |
| <b>#5</b> Neuromuscular blockade             | ≈       | O       | V       | O        | X        | V        | ≈        | V              |
| <b>#6</b> Thromboprophylaxis                 | O       | V       | V       | O        | O        | O        | O        | V              |
| <b>#7</b> Stress ulcer prophylaxis           | O       | O       | V       | O        | O        | O        | O        | ≈              |
| <b>#8</b> Fluids for septic shock (1)        | O       | O       | V       | O        | V        | V        | O        | ≈              |
| <b>#9</b> Fluids for septic shock (2)        | O       | O       | V       | O        | V        | V        | O        | ≈              |
| <b>#10</b> Vasopressor for septic shock (1)  | O       | O       | V       | ≈        | V        | V        | O        | O              |
| <b>#11</b> Vasopressor for septic shock (2)  | O       | O       | X       | ≈        | ≈        | X        | O        | O              |
| <b>#12</b> Inotropes for septic shock        | O       | O       | V       | ≈        | V        | V        | O        | O              |
| <b>#13</b> Systemic corticosteroids          | V       | V       | V       | X        | X        | X        | V        | X <sup>1</sup> |

Indicators: V: for; ≈: insufficient; X: against; ≠: different; O: out of scope

<sup>1</sup> UpToDate has changed their previous recommendation of against routine use of corticosteroids to recommend low-dose corticosteroid therapy for intensive-care patients who require oxygen supplementation and selected patients with refractory shock on 1<sup>st</sup> of July 2020.

**Table S3:** Clinical implications for inconsistencies among comparator CPGs with WHO CPG

|                                                                                                                                                                                                                                                                  |
|------------------------------------------------------------------------------------------------------------------------------------------------------------------------------------------------------------------------------------------------------------------|
| <b>Reference recommendation #1: Initial oxygen therapy</b>                                                                                                                                                                                                       |
| A clear target should be of consensus since hyperoxia or hypoxia may impact the clinical outcomes of critically ill COVID-19 patients.                                                                                                                           |
| <b>Reference recommendation #2: Maintenance O2 Therapy</b>                                                                                                                                                                                                       |
| The main argument in CPGs inconsistent with WHO was that liberal oxygen therapy was associated with worse clinical outcomes and thus the recommendation of maximum target SpO <sub>2</sub> .                                                                     |
| <b>Reference recommendation #3: Empiric antibiotics</b>                                                                                                                                                                                                          |
| Differential diagnosis of bacterial pneumonia was the rationale for empirical antibiotics, but the approach should be detailed for escalation or de-escalation/discontinuation of antibiotic therapy to avoid antibiotic resistance.                             |
| <b>Reference recommendation #5: Neuromuscular blockade</b>                                                                                                                                                                                                       |
| Specifications of clinical situation(s) where neuromuscular blockade by continuous infusion must not be initiated should be clarified by consensus and may be more useful to clinicians. The definition of 'routine use' may be subject to many interpretations. |
| <b>Reference recommendation #11: Vasopressor for septic shock (2)</b>                                                                                                                                                                                            |
| SSC argued for a lower MAP target due to some evidence of harms associated with a higher MAP target. This ought to be solved by consensus among organizations since there may be different interpretations of the same sources of evidence.                      |
| <b>Reference recommendation #13: Systemic corticosteroids</b>                                                                                                                                                                                                    |
| Specifications of clinical situation(s) where corticosteroid therapy must not be initiated should be clarified by consensus and may be more useful to clinicians. The definition of 'routine use' may be subject to many interpretations.                        |
