# Supplementary material
Source: PubMed Central journal article supplement (PMC7788212)

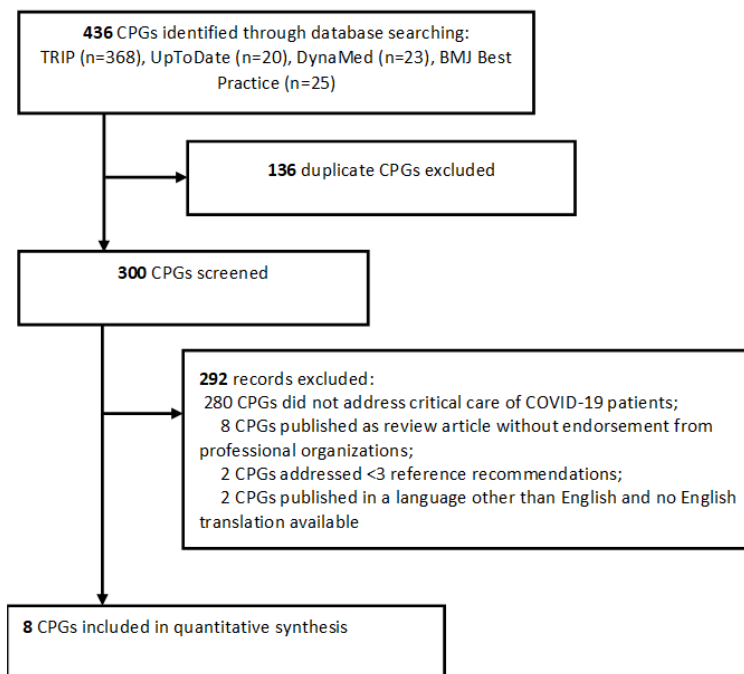

**Figure 1:** Selection process of clinical practice guidelines for analysis

Supplement: ejhpharm-2020-002388supp001.pdf [file ejhpharm-2020-002388supp001.pdf]
